# Supplementary material for: Prevalence of New-Onset Atrial Fibrillation and Associated Outcomes in Patients with Sepsis: A Systematic Review and Meta-Analysis
Source: MDPI journal article supplement (doi:10.3390/jpm12040547), 2022-03-30
Supplement: s1 [file s1]

## Supplementary Materials

**Table S1.** Full Search Strategy.

| PubMed                                                                                                                                                             |
|--------------------------------------------------------------------------------------------------------------------------------------------------------------------|
| #1 sepsis"[MeSH Terms] OR "sepsis"[All Fields] OR "septicaemias"[All Fields] OR "septicemias"[All Fields] OR "septicaemia"[All Fields] OR "septicemia"[All Fields] |
| #2 "bacteraemia"[All Fields] OR "bacteremia"[MeSH Terms] OR "bacteremia"[All Fields] OR "bacteraemias"[All Fields] OR "bacteremias"[All Fields]                    |
| #3 "septic"[All Fields] OR "septics"[All Fields]                                                                                                                   |
| #4 #1 OR #2 OR #3                                                                                                                                                  |
| #5 ("atrial fibrillation"[MeSH Terms] OR ("atrial"[All Fields] AND "fibrillation"[All Fields])) OR "atrial fibrillation"[All Fields]                               |
| #6 #4 AND #5                                                                                                                                                       |
| EMBASE                                                                                                                                                             |
| #1 'sepsis'/exp OR 'sepsis' OR 'septicemia' OR 'bacteremia' OR septic                                                                                              |
| #2 'atrial fibrillation'                                                                                                                                           |
| #3 #1 AND #2                                                                                                                                                       |

**Table S2.** Bias Assessment—NOS for incidence of new onset Atrial Fibrillation.

| Study                       | Selection (2) | Comparability (1) | Outcome (2) | Total (5) |
|-----------------------------|---------------|-------------------|-------------|-----------|
| Arunachalam 2020* [18]      | 1             | 0                 | 1           | 2         |
| Bosch 2019 [19]             | 2             | 1                 | 2           | 5         |
| Chen 2015* [20]             | 1             | 0                 | 1           | 2         |
| Christian 2008* [21]        | 2             | 1                 | 1           | 4         |
| Fernando 2020* [22]         | 1             | 0                 | 1           | 2         |
| Guenancia 2015** [23]       | 1             | 1                 | 2           | 4         |
| Hayase 2016*,** [24]        | 1             | 0                 | 1           | 2         |
| Klein Klouwenberg 2017 [25] | 2             | 1                 | 2           | 5         |
| Koyfman 2015* [26]          | 2             | 0                 | 1           | 3         |
| Launey 2019*** [27]         | 1             | 1                 | 2           | 5         |
| Lewis 2016 [28]             | 2             | 1                 | 2           | 5         |
| Liu 2016 [29]               | 2             | 1                 | 2           | 5         |
| Meierhenrich 2010 [30]      | 1             | 1                 | 2           | 4         |
| Moss 2017* [31]             | 2             | 1                 | 1           | 4         |
| Para 2020*,** [32]          | 0             | 0                 | 1           | 1         |
| Personett 2012*,# [33]      | 2             | 1                 | 1           | 4         |
| Salman 2008** [34]          | 1             | 1                 | 2           | 4         |
| Seemann 2015**,# [35]       | 1             | 1                 | 1           | 3         |
| Shaver 2015* [36]           | 1             | 1                 | 1           | 3         |
| Walkey 2014 [37]            | 2             | 1                 | 2           | 5         |
| Walkey 2011# [12]           | 2             | 1                 | 1           | 4         |
| Wieruszewski 2021*,# [38]   | 1             | 1                 | 1           | 3         |

Legend: \*No/missing baseline characteristics/information for the whole cohort of sepsis patients; \*\*Sample size less than 100 patients. \*\*\*Selected african/american patients. #Possible bias in definition of noAF NOS = Newcastle-Ottawa Scale.

**Table S3.** Bias Assessment—NOS for outcomes according to new onset Atrial Fibrillation.

| Study                       | Selection (4) | Comparability (2) | Outcome (3) | Total (9) |
|-----------------------------|---------------|-------------------|-------------|-----------|
| Bosch 2019 [19]             | 4             | 2                 | 3           | 9         |
| Chen 2015* [20]             | 3             | 0                 | 3           | 6         |
| Christian 2008* [21]        | 3             | 1                 | 3           | 7         |
| Guenancia 2015 [23]         | 4             | 2                 | 3           | 9         |
| Klein Klouwenberg 2017 [25] | 4             | 2                 | 3           | 9         |
| Liu 2016 [29]               | 4             | 2                 | 3           | 9         |
| Meierhenrich 2010 [30]      | 4             | 1                 | 3           | 8         |
| Salman 2008 [34]            | 4             | 1                 | 3           | 8         |
| Walkey 2011# [12]           | 3             | 2                 | 3           | 8         |

Legend: \*No/Missing baseline characteristics/informations for sepsis patients; #Possible bias in definition of noAF NOS= Newcastle-Ottawa Scale.

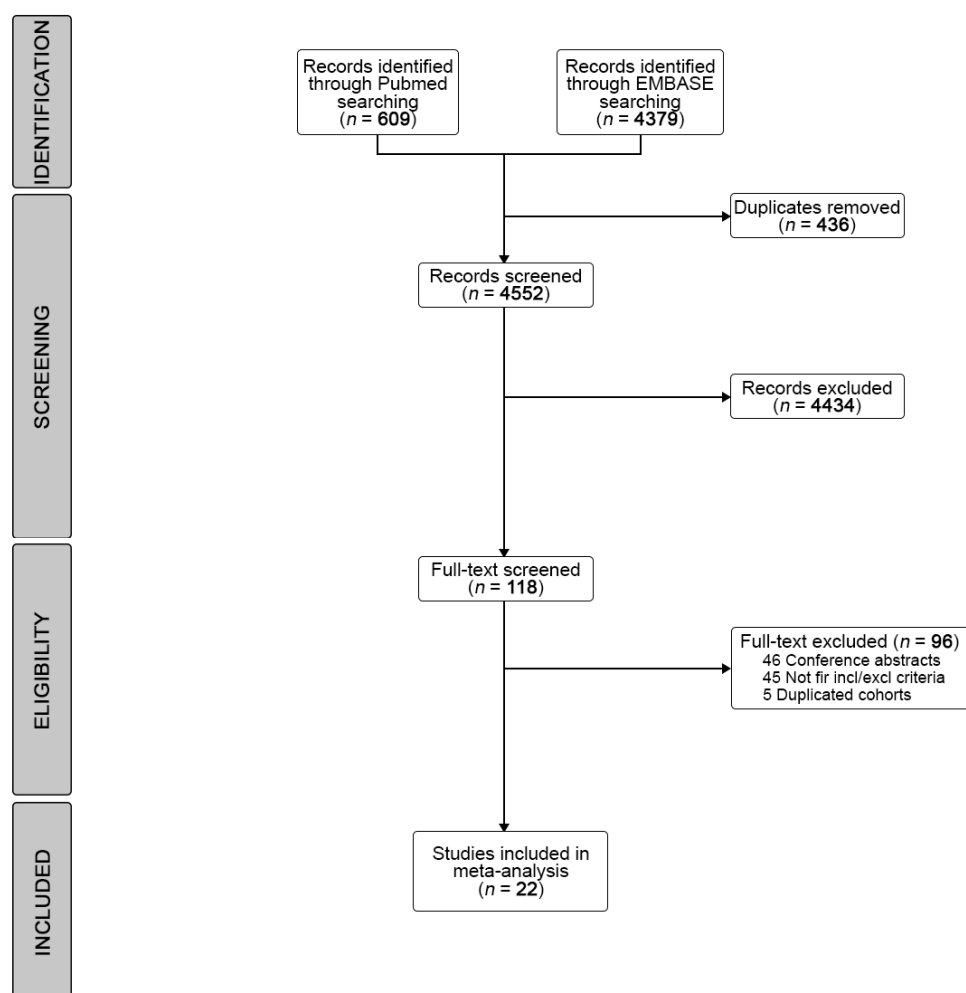**Figure S1.** PRISMA Flow-Chart of the Study.

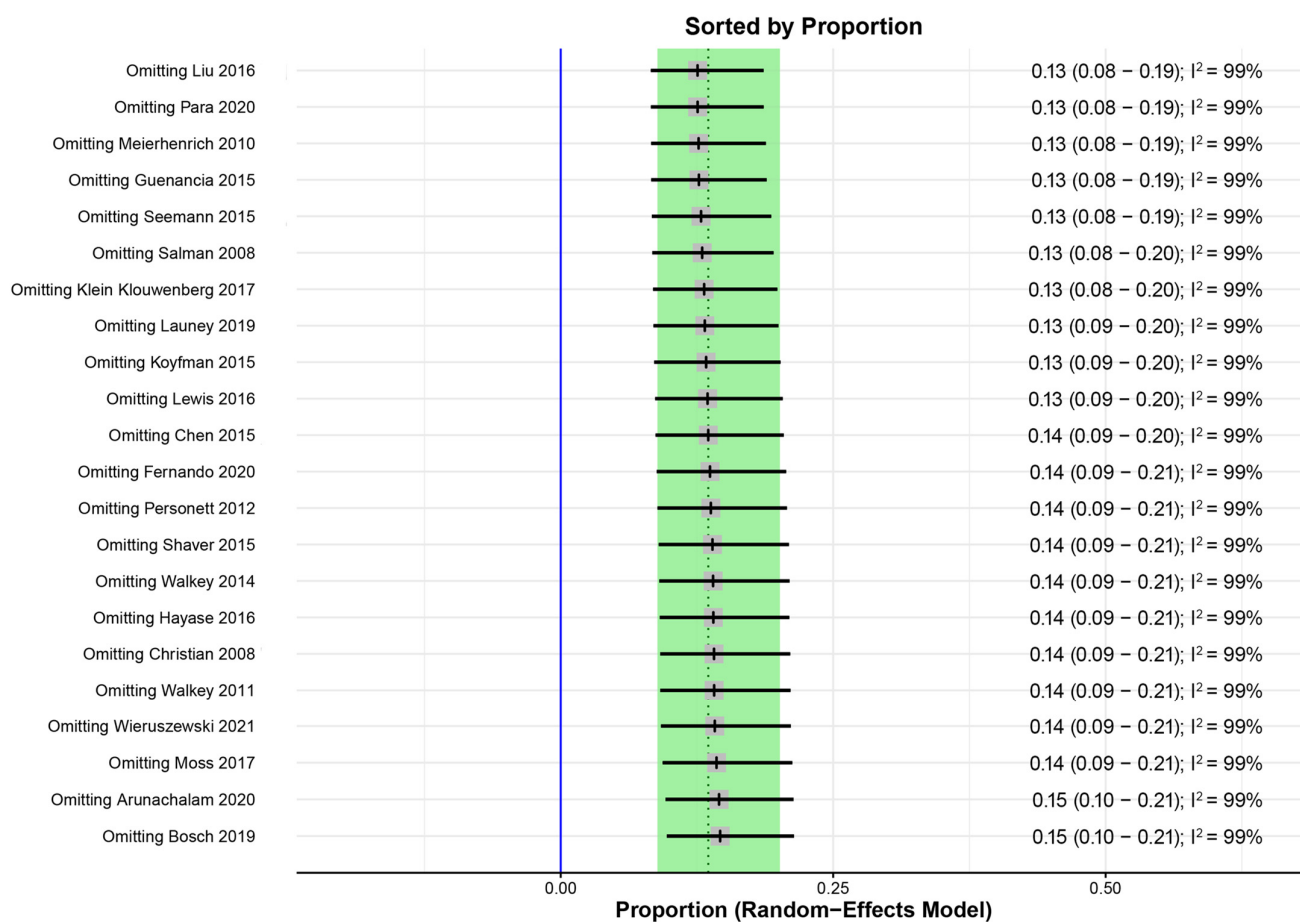

**Figure S2.** Leave one out analysis for NOAF Prevalence [12,18–38]. Abbreviation:  $I^2$  = inconsistency index.

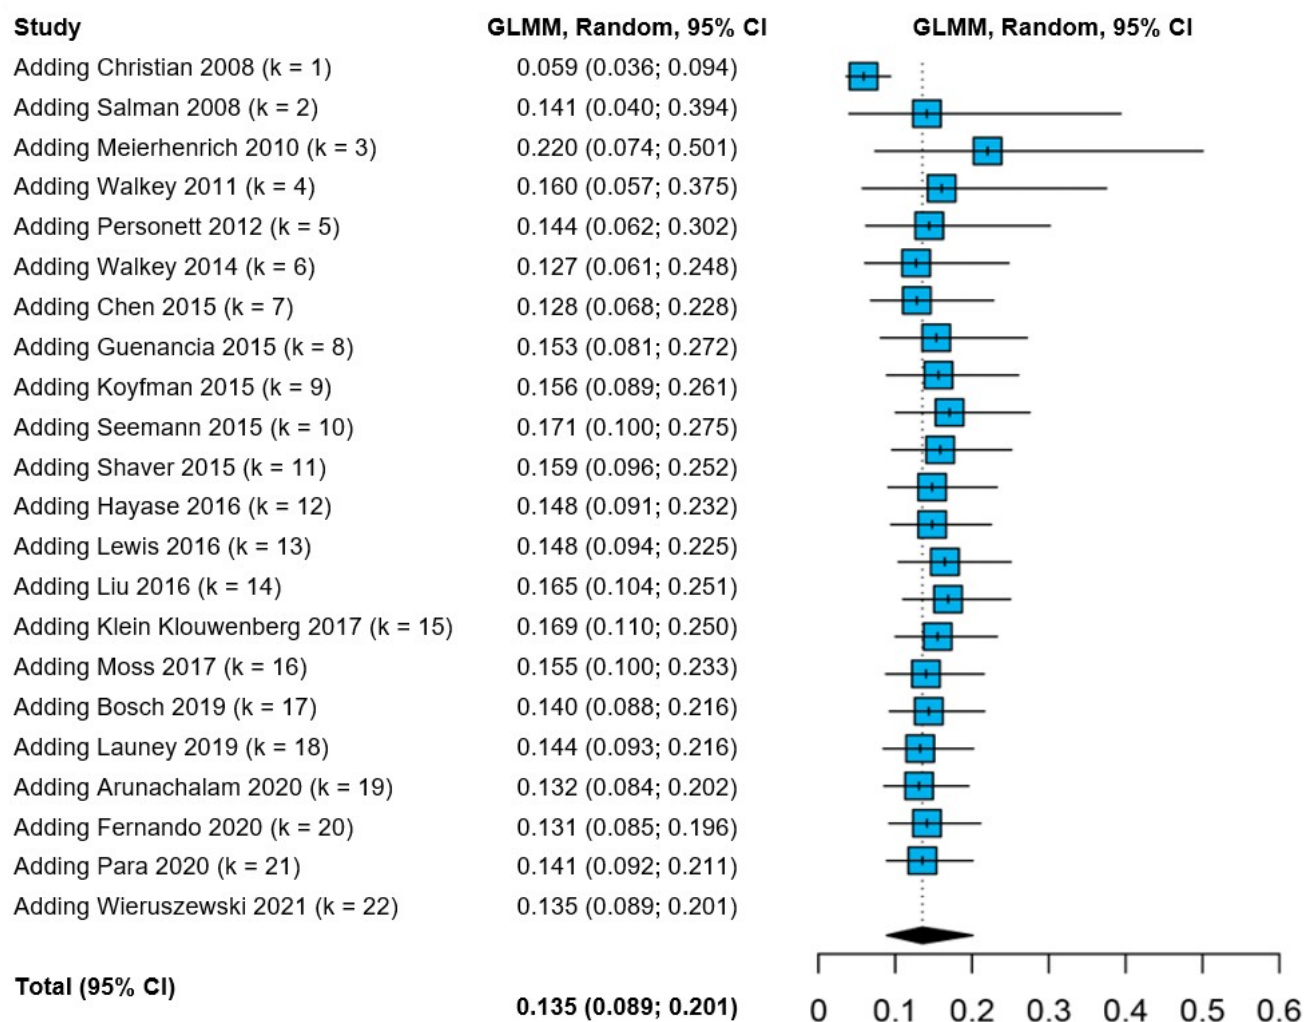

**Figure S3.** Cumulative Meta-Analysis of Prevalence of NOAF based on Study Publication Year [12,18–38]. Abbreviations: GLMM = generalized linear mixed model; CI = confidence interval.

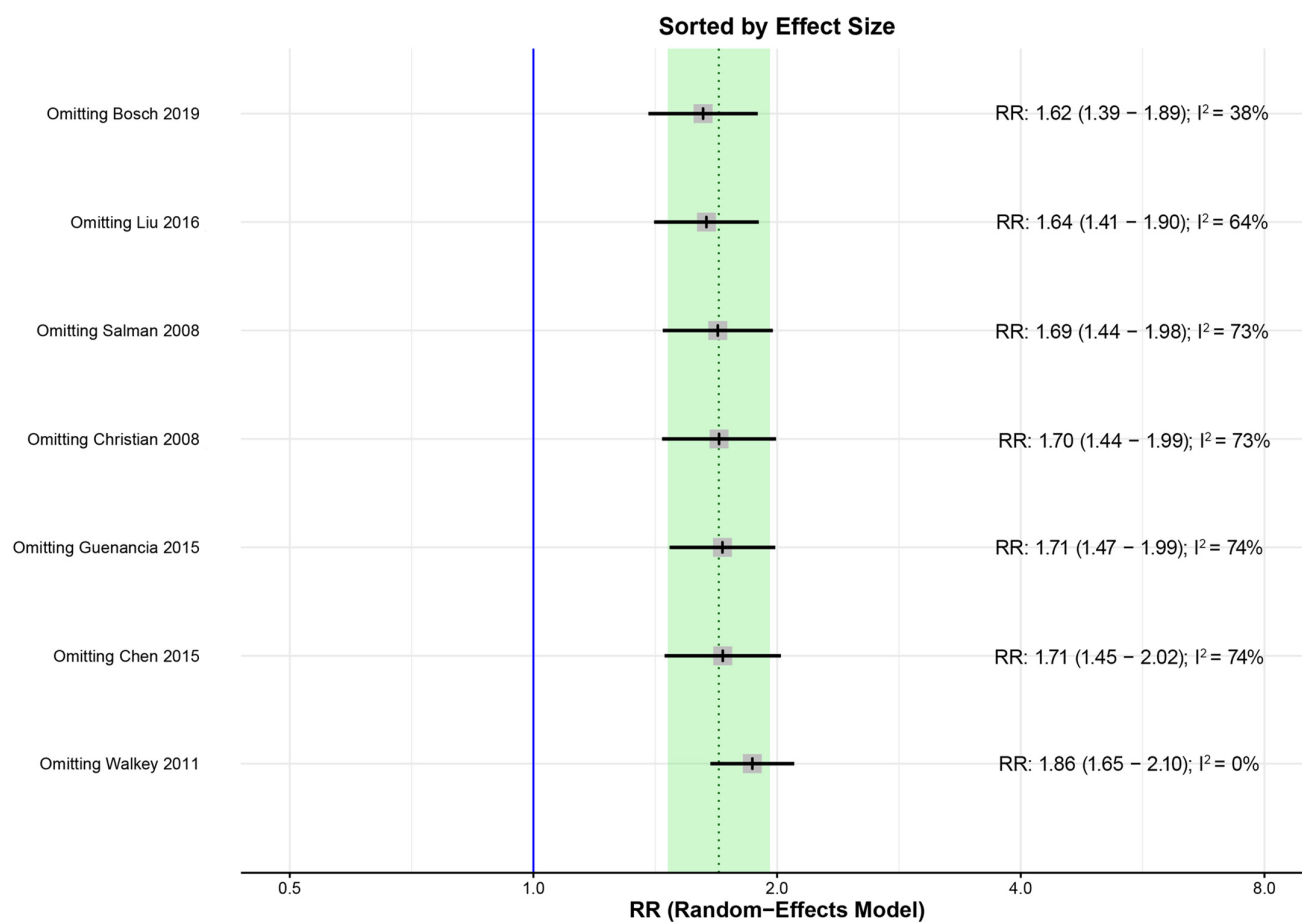

**Figure S4.** Leave one out analysis for in-hospital mortality according to NOAF [12,19–21,23,29,34]. Abbreviation: I<sup>2</sup> = inconsistency index, RR = Risk Ratio.

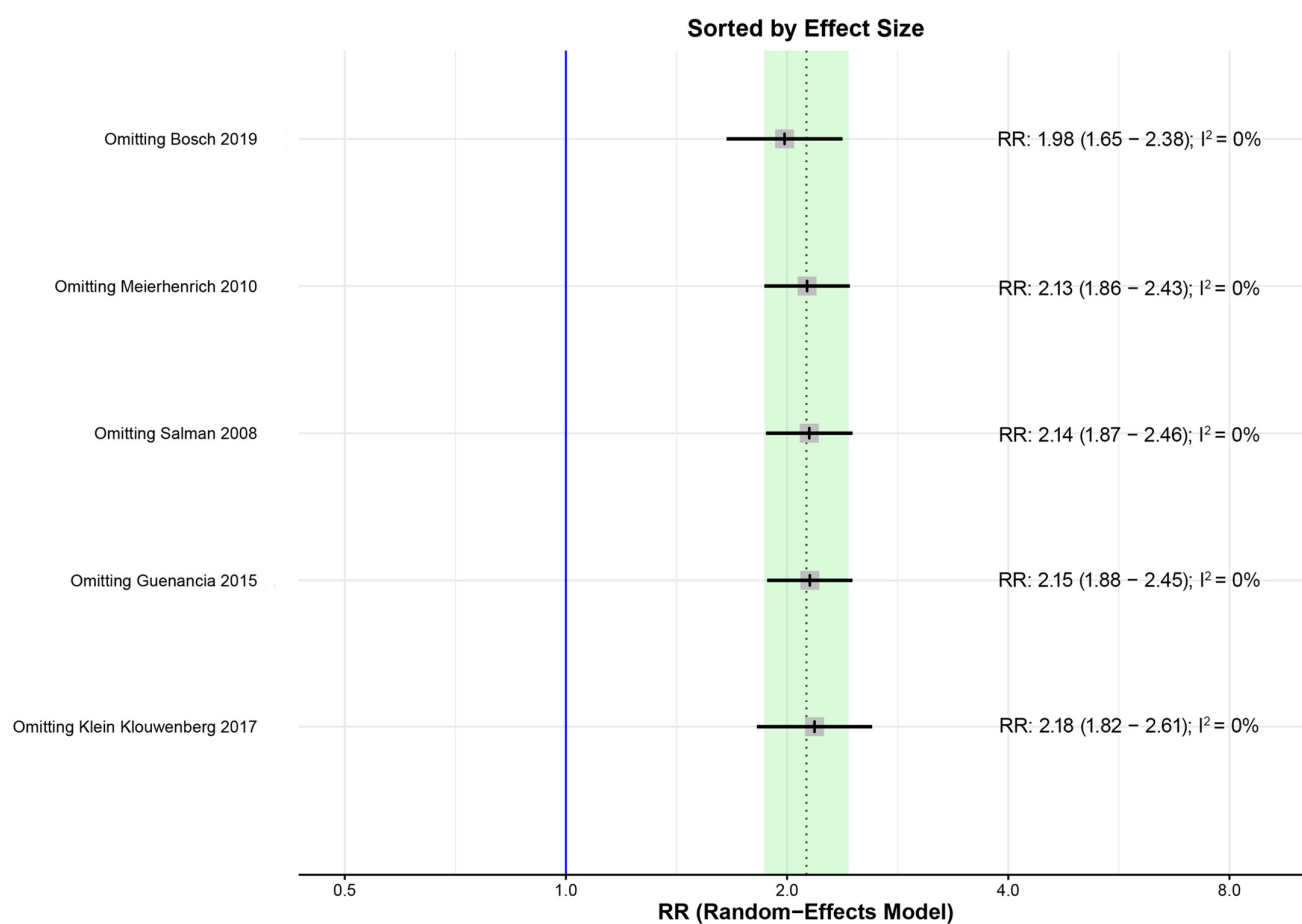

**Figure S5.** Leave one out analysis for ICU mortality in patients with NOAF [19,23,25,30,34]. Abbreviation: I² = inconsistency index, RR = Risk Ratio.
